# Supplementary material for: FUS Negatively Regulates Kaposi’s Sarcoma-Associated Herpesvirus Gene Expression
Source: Viruses. 2018 Jul 6;10(7):359. doi: 10.3390/v10070359 (PMC6070805; doi:10.3390/v10070359)
Supplement: Supplementary file 1 [file viruses-10-00359-s001.xlsx]

## Sheet: Sheet1
Gene	Forward	Reverse
18S rRNA	5’ GTAACCCGTTGAACCCCATT	5’ CCATCCAATCGGTAGTAGCG
KSHV ORF50	5' GAGTCCGGCACACTGTACC	5' AAACTGCCTGGGAAGTTAACG
LANA	5' TTGGATCTCGTCTTCCATCC	5' ACCAGACGATGACCCACAAC
K1	5’ CCAAACGGACGAAATGAAAC	5’ TGTGTGGTTGCATCGCTATT
vGPCR	5’ GTGCCTTACACGTGGAACGTT	5’ GGTGACCAATCCATTTCCAAGA
vIL6	5’ CTGTTACCGTACCGGCATCT	5’ AGAAGCTCCATGACGTCCAC
PAN	5' ATAGGCGACAAAGTGAGGTGGCAT	5' TAACATTGAAAGAGCGCTCCCAGC
ORF45	5’ GGGATGGGTTAGTCAGGATG	5’ CCTCGTCGTCTGAAGGTGA
Total ORF50	5’ CGCAATGCGTTACGTTGTTG	5’ GCCCGGACTGTTGAATCG
ORF52	5’ AAATCGAAGCCAGGGTCAGG	5’ CTCCTCTTCGTCGCCTGTTATTG
ORF57	5’ TGGACATTATGAAGGGCATCCTA	5’ CGGGTTCGGACAATTGCT
ORF59	5’ ACAGTCACCGTTTGGTCCTC	5’ TGTACTCGACGCTGGCATAG
GAPDH	5’ TTGCCATCAATGACCCCTTCA	5’ CGCCCCACTTGATTTTGGA
PAN ChIP	5’ GGTGACCCAACATAGTGATTCGG	5’ CAGTGCTAAACTGACTCAAGCTG
Actin ChIP	5’ CTAAGGCCAACCGTGAAAAGAT	5’ CACAGCCTGGATGGCTACGT
ORF50 ChIP	5’ TGGCATTTTGCCCGCATGTA	5’ CGAGCGTATTCTCAGAGGTC
ORF57 ChIP	5’ ATTAGGGTGAGCGAAGTCACG	5’ GCTTGTACCATGTCCTTTGGTT
vIL6 ChIP	5’ GCGCCTCCCGGTACAAGTCC	5’ GACCATTGGCGGGTAGAATC
Second FUS siRNA	5'rCrGrCrGrGrArCrAUrGrGrCrCUrCrArA
